# Supplementary material for: A “Mesh Scaffold” that regulates the mechanical properties and restricts the phase transition-induced volume change of the PNIPAM-based hydrogel for wearable sensors
Source: Royal Society of Chemistry journal article supplement (doi:10.1039/d3mh01638b), 2023-11-16
Supplement: d3mh01638b6.pdf [file d3mh01638b6.pdf]

## Supporting Information

### **A “Mesh Scaffold” that Regulates Mechanical Properties and Restricts Phase Transition-induced Volume Change of PNIPAM-Based Hydrogel for Wearable Sensors**

*Xiaoyong Zhang<sup>a, \*</sup>, Haoran Ding<sup>a</sup>, Zhaozhao Li<sup>a</sup>, Yongping Bai<sup>b</sup>, Lidong Zhang<sup>c, \*</sup>*

<sup>a</sup> School of Materials Science and Engineering, Anhui University of Science and Technology, Huainan, Anhui 232001, P. R. China

<sup>b</sup> School of Chemistry and Chemical Engineering, Harbin Institute of Technology, Harbin, Heilongjiang 150000, P. R. China

<sup>c</sup> School of Chemistry and Molecular Engineering, East China Normal University, Shanghai, 200241, P. R. China

*\* Corresponding authors.*

*E-mail: [xiaoyongzhang@aust.edu.cn](mailto:xiaoyongzhang@aust.edu.cn) (X. Zhang),*

*E-mail: [ldzhang@chem.ecnu.edu.cn](mailto:ldzhang@chem.ecnu.edu.cn) (L. Zhang)*

**Table S1** Formulations of prepared PSAs-MPT Gels

| Sample     | Comprise (g)   |                                               |                 |                   |                  |
|------------|----------------|-----------------------------------------------|-----------------|-------------------|------------------|
|            | BA             | AA                                            | HEA             | ZrAC<br>A         | Irgacure<br>2959 |
| PSAs layer | 0.6            | 0.03                                          | 0.1             | 0.001             | 0.005            |
| Sample     | Solution A (g) |                                               |                 |                   |                  |
|            | NIPAM          | MBA                                           | [BMIM]Cl        | Irgacur<br>e 2959 | Water            |
| PSAs-MPT   | 2.4            | 0.0012                                        | 0.1             | 0.03              | 5.1              |
| Sample     | Solution B (g) |                                               |                 |                   |                  |
|            | PVA            | Na <sub>2</sub> B <sub>4</sub> O <sub>7</sub> | Water<br>(pH=2) |                   |                  |
| PSAs-MPT   | 0.3            | 0.06                                          | 3.6             |                   |                  |

**Table S2** Monomer conversion of the C=C bond from MPT gels as a function of UV irradiation time

| UV irradiation time<br>(min) | Monomer conversion<br>(%) |
|------------------------------|---------------------------|
| 0                            | 0                         |
| 1                            | 6.8                       |
| 2                            | 18.7                      |
| 3                            | 52.1                      |
| 4                            | 81.9                      |
| 5                            | 91.4                      |
| 6                            | 97.8                      |
| 7                            | 98.3                      |
| 8                            | 98.3                      |
| 9                            | 98.3                      |
| 10                           | 98.3                      |

**Table S3** Mechanical properties of prepared PSAs-MPT hydrogels soaked in alkali solutions

| Sample      | Mechanical properties |                    |                                |                       |
|-------------|-----------------------|--------------------|--------------------------------|-----------------------|
|             | Maximum stress (KPa)  | Maximum strain (%) | Toughness (KJ/m <sup>3</sup> ) | Young's modulus (kPa) |
| Alkaline-0  | 57.8 ± 0.53           | 396 ± 14           | 11.3 ± 0.8                     | 14.96 ± 0.6           |
| Alkaline-5  | 61.3 ± 0.6            | 356 ± 23           | 10.9 ± 0.5                     | 24.67 ± 1.6           |
| Alkaline-10 | 62.5 ± 0.47           | 264 ± 25           | 8.14 ± 0.6                     | 26.89 ± 2.1           |
| Alkaline-15 | 63.1 ± 0.49           | 222 ± 20           | 7.55 ± 0.4                     | 38.0 ± 3.4            |
| Alkaline-20 | 64.2 ± 0.51           | 205 ± 15           | 7.0 ± 0.54                     | 42.3 ± 1.22           |
| Alkaline-25 | 66.7 ± 0.52           | 200 ± 11           | 7.1 ± 0.8                      | 45.3 ± 0.5            |

**Table S4** Mechanical properties of prepared PSAs-MPT hydrogels soaked in acidic solutions

| Sample    | Mechanical properties |                    |                                |                       |
|-----------|-----------------------|--------------------|--------------------------------|-----------------------|
|           | Maximum stress (KPa)  | Maximum strain (%) | Toughness (KJ/m <sup>3</sup> ) | Young's modulus (kPa) |
| Acidic-0  | 66.7 ± 0.52           | 200 ± 11           | 7.1 ± 0.8                      | 45.3 ± 0.5            |
| Acidic-2  | 55.9 ± 0.52           | 229 ± 12           | 7.9 ± 0.5                      | 34 ± 3.2              |
| Acidic-4  | 55.0 ± 0.49           | 240 ± 10           | 8.1 ± 0.4                      | 24.6 ± 3.6            |
| Acidic-6  | 54.5 ± 0.53           | 324 ± 9            | 8.4 ± 0.8                      | 18.3 ± 2.7            |
| Acidic-8  | 54.0 ± 0.55           | 373 ± 7            | 10.5 ± 1.0                     | 10.67 ± 3.3           |
| Acidic-10 | 51.3 ± 0.42           | 410 ± 9            | 10.6 ± 0.7                     | 6.7 ± 1.7             |

**Table S5** Adhesion performance of PSAs-MPT hydrogels with 1.5 mm and 2.5 mm thickness for various substrates.

| Sample | Adhesive strength (N) |              |              |              |             |
|--------|-----------------------|--------------|--------------|--------------|-------------|
|        | Stainless steel       | Glass        | Aluminum     | PP           | PTFE        |
| 1.5 mm | 18.68 ± 2.41          | 22.87 ± 1.52 | 14.65 ± 2.23 | 12.88 ± 3.34 | 3.0 ± 2.23  |
| 2.5 mm | 20.61 ± 1.33          | 27.86 ± 2.91 | 16.01 ± 2.45 | 15.06 ± 1.22 | 4.03 ± 2.32 |

**Table S6** Adhesion performance of PSAs-MPT hydrogels with 1.5 mm and 2.5 mm thickness through 8 cyclic adhesion tests on glass substrate

| Sample  | Adhesive strength (KPa) |        |
|---------|-------------------------|--------|
|         | 1.5 mm                  | 2.5 mm |
| Cycle 1 | 22.87                   | 27.86  |
| Cycle 2 | 22.5                    | 27.6   |
| Cycle 3 | 22.4                    | 27.1   |
| Cycle 4 | 22.45                   | 26.8   |
| Cycle 5 | 22.21                   | 26.5   |
| Cycle 6 | 21.9                    | 26.4   |
| Cycle 7 | 21.7                    | 26.3   |
| Cycle 8 | 21.4                    | 26.35  |

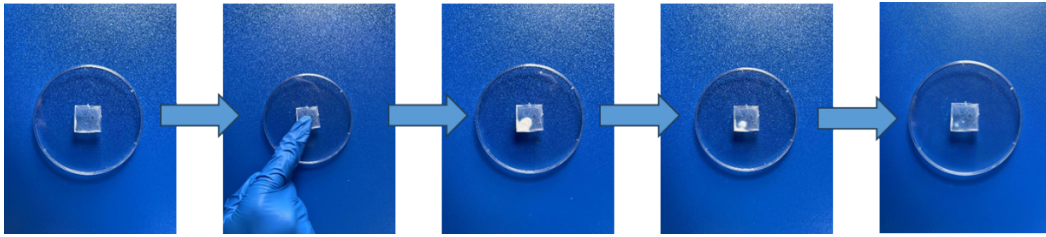

**Fig. S1 (a)** Response of PSAs-MPT hydrogel to human skin temperature at room temperature (around 25 °C).



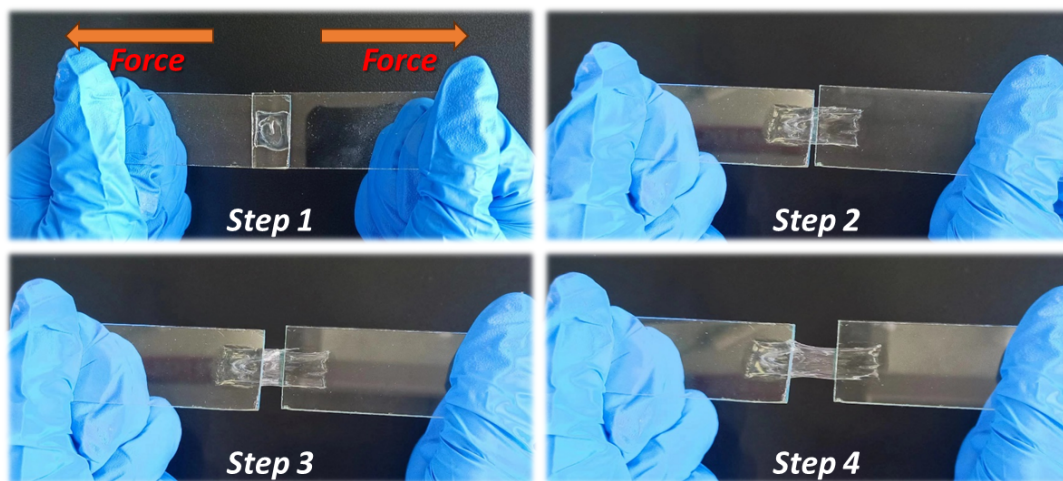

**Fig. S2** Adhesion performance of PSAs-MPT hydrogel on glass substrate.

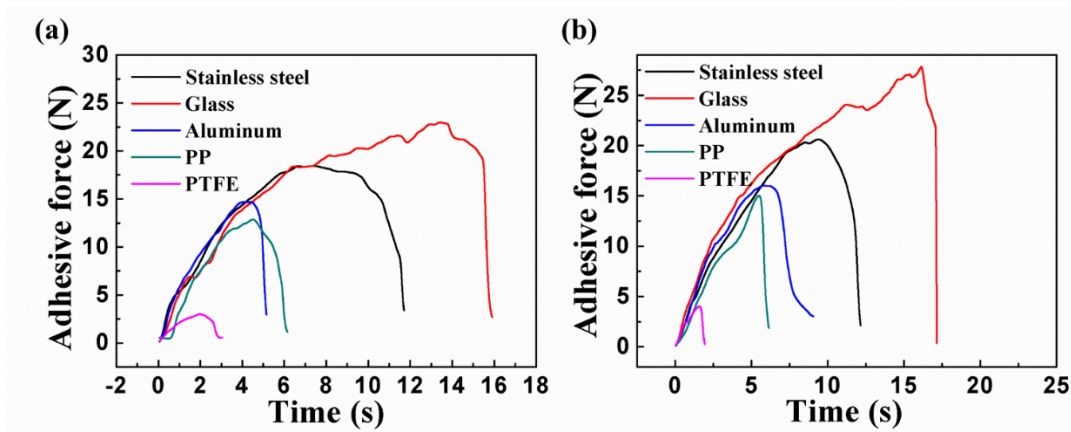

**Fig. S3** Adhesion performance of PSAs-MPT hydrogel for different substrates: (a) 1.5 mm of thickness; (b) 2.5 mm of thickness.

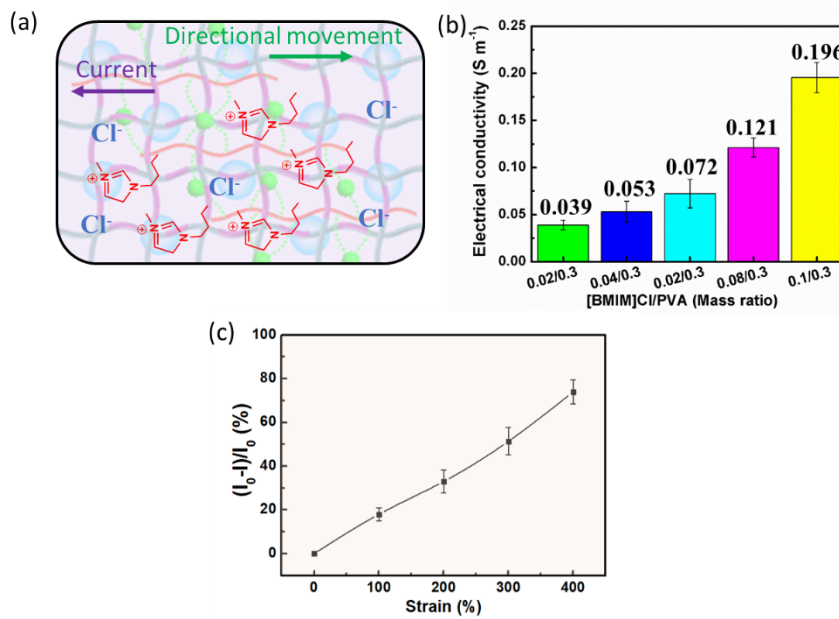

**Fig. S4** Conductivity of PSAs-MPT hydrogel for different substrates: (a) the schematic diagram of the conductive hydrogel with [BMIM]Cl; (b) the conductivity of the hydrogels with [BMIM]Cl content; (b) the relative current change of the hydrogel under different strain.
